# Supplementary material for: Quercetin protects ARPE-19 cells against photic stress mediated by the products of rhodopsin photobleaching
Source: Royal Society of Chemistry journal article supplement (doi:10.1039/d0pp00165a), 2020-06-08
Supplement: d0pp00165a1.pdf [file d0pp00165a1.pdf]

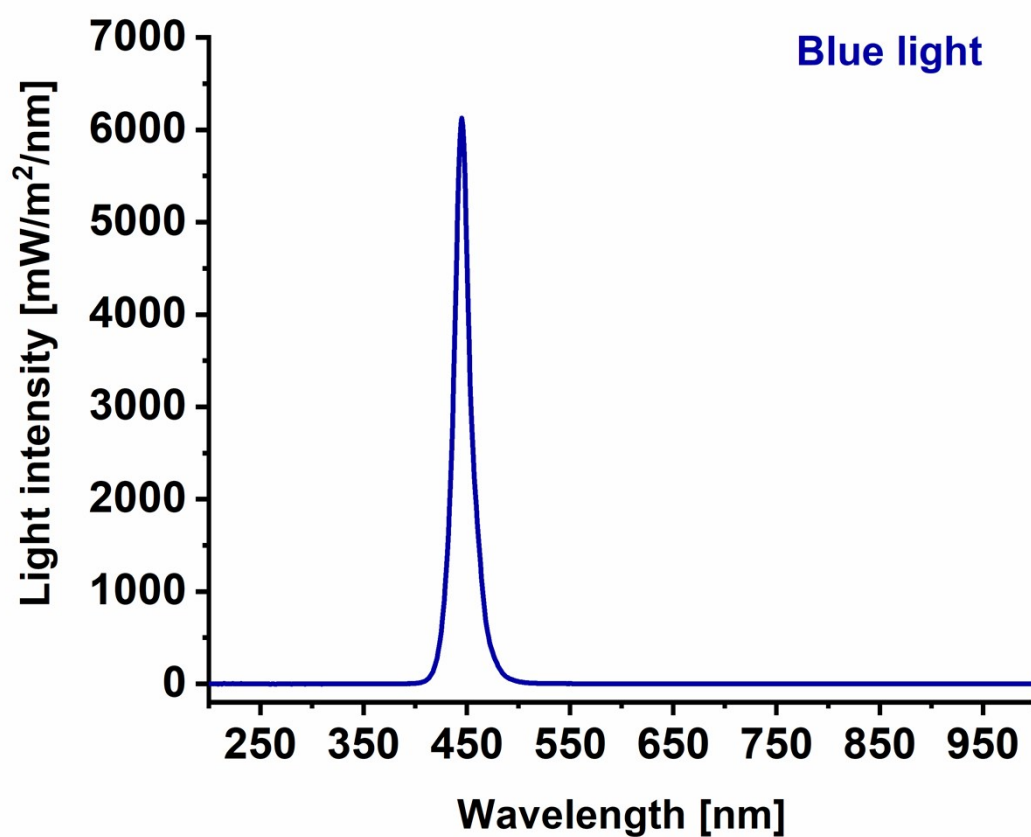

#### Electronic Supplementary Information\_1

Emission spectra of a dedicated custom-made high-power COB LED light source determined by a spectroradiometer GL Spectis 5.0 Touch.

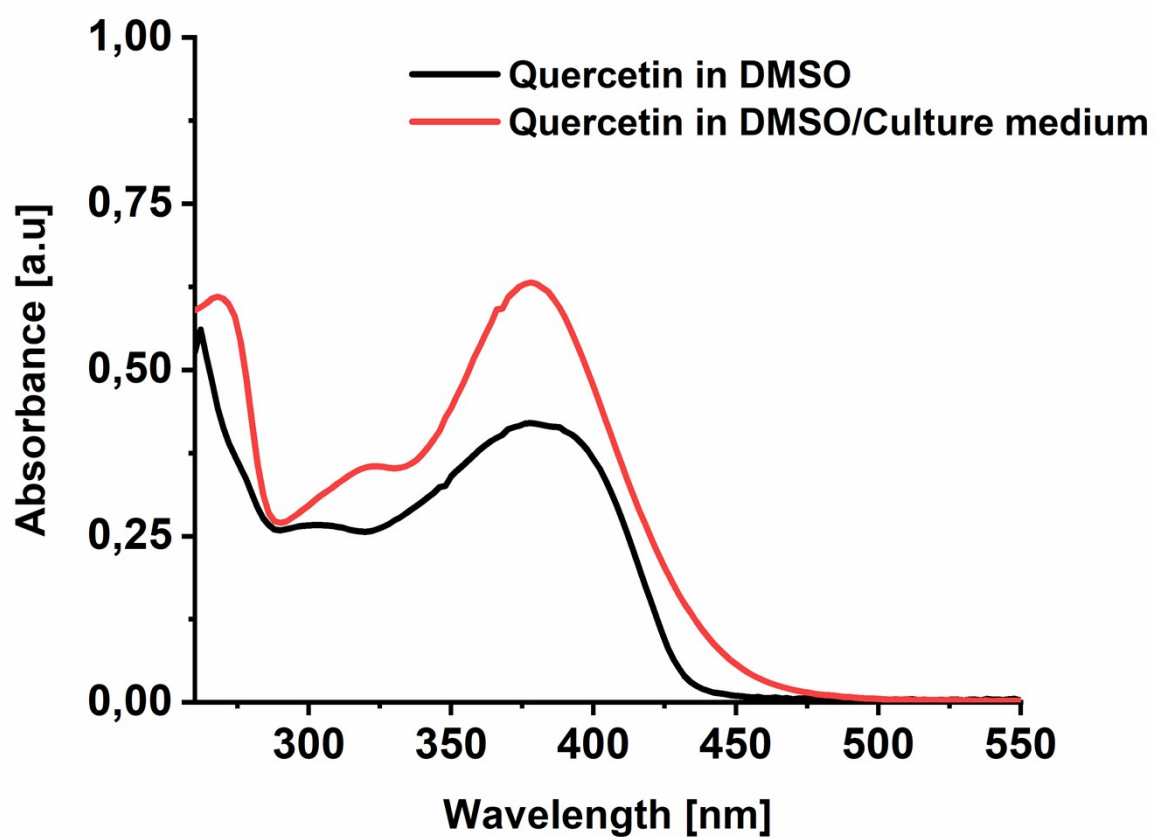

#### Electronic Supplementarny Information\_2

Spectroscopic analyzes of quercetin solutions prepared in DMSO and in DMSO diluted in cell culture medium.
